# Supplementary material
Source: PubMed Central journal article supplement (PMC5761947)
Supplement: JHC739283_Supplemental_Table_online_supp.pdf [file JHC739283_Supplemental_Table_online_supp.pdf]

**Supplementary table:**

**Supplementary table 1: All genes screened by osteogenic PCRArray.** The gene name and abbreviation is given, p-value and fold up- or down-regulation.

**Supplementary table 1:**

| <b>Gene name</b>                                                       | <b>Gene name (abbreviation)</b> | <b>T-test p-value</b> | <b>Fold up- or down-regulation</b> |
|------------------------------------------------------------------------|---------------------------------|-----------------------|------------------------------------|
| Activin A receptor, type 1                                             | Acvr1                           | 0.236910              | -1,35                              |
| Alpha-2-HS-glycoprotein                                                | Ahsg                            | 0.591086              | 1,26                               |
| Alkaline phosphatase, liver/bone/kidney                                | Alpl                            | <b>0.006653</b>       | <b>-4,65</b>                       |
| Annexin A5                                                             | Anxa5                           | <b>0.000772</b>       | <b>-1,46</b>                       |
| Bone gamma carboxyglutamate protein                                    | Bglap                           | 0.186587              | -2,98                              |
| Biglycan                                                               | Bgn                             | <b>0.002045</b>       | -1,32                              |
| Bone morphogenetic protein 1                                           | Bmp1                            | <b>0.000425</b>       | <b>-1,66</b>                       |
| Bone morphogenetic protein 2                                           | Bmp2                            | <b>0.001006</b>       | <b>-1,46</b>                       |
| Bone morphogenetic protein 3                                           | Bmp3                            | <b>0.014371</b>       | <b>-4,44</b>                       |
| Bone morphogenetic protein 4                                           | Bmp4                            | <b>0.001720</b>       | <b>-1,80</b>                       |
| Bone morphogenetic protein 5                                           | Bmp5                            | <b>0.000457</b>       | <b>-3,24</b>                       |
| Bone morphogenetic protein 6                                           | Bmp6                            | <b>0.000020</b>       | <b>-4,37</b>                       |
| Bone morphogenetic protein 7                                           | Bmp7                            | <b>0.033857</b>       | 1,34                               |
| Bone morphogenetic protein receptor, type 1A                           | Bmpr1a                          | <b>0.000071</b>       | <b>-1,72</b>                       |
| Bone morphogenetic protein receptor, type 1B                           | Bmpr1b                          | <b>0.005932</b>       | <b>-2,33</b>                       |
| Bone morphogenetic protein receptor, type II (serine/threonine kinase) | Bmpr2                           | <b>0.007525</b>       | <b>-1,65</b>                       |
| CD36 antigen                                                           | Cd36                            | <b>0.020480</b>       | <b>-448,75</b>                     |
| Cadherin 11                                                            | Cdh11                           | <b>0.001222</b>       | <b>-1,77</b>                       |
| Chordin                                                                | Chrd                            | <b>0.000044</b>       | <b>-1,53</b>                       |
| Collagen, type X, alpha 1                                              | Col10a1                         | <b>0.003539</b>       | <b>-3,60</b>                       |
| Collagen, type XIV, alpha 1                                            | Col14a1                         | <b>0.002100</b>       | <b>-8,57</b>                       |
| Collagen, type I, alpha 1                                              | Col1a1                          | <b>0.019354</b>       | -1,35                              |
| Collagen, type I, alpha 2                                              | Col1a2                          | <b>0.002378</b>       | <b>-1,64</b>                       |
| Collagen, type II, alpha 1                                             | Col2a1                          | <b>0.000011</b>       | <b>-8,21</b>                       |
| Collagen, type III, alpha 1                                            | Col3a1                          | <b>0.000392</b>       | <b>-1,47</b>                       |
| Collagen, type IV, alpha 1                                             | Col4a1                          | 0.133077              | 1,10                               |
| Collagen, type V, alpha 1                                              | Col5a1                          | <b>0.005515</b>       | <b>-1,47</b>                       |
| Cartilage oligomeric matrix protein                                    | Comp                            | <b>0.000355</b>       | <b>-3,87</b>                       |
| Colony stimulating factor 1 (macrophage)                               | Csf1                            | 0.785532              | 1,02                               |
| Colony stimulating factor 2 (granulocyte-macrophage)                   | Csf2                            | 0.184865              | 13,79                              |
| Colony stimulating factor 3 (granulocyte)                              | Csf3                            | 0.334985              | -1,57                              |
| Cathepsin K                                                            | Ctsk                            | <b>0.000014</b>       | <b>-3,24</b>                       |
| Distal-less homeobox 5                                                 | Dlx5                            | <b>0.000401</b>       | <b>-3,18</b>                       |
| Epidermal growth factor                                                | Egf                             | <b>0.002158</b>       | <b>-2,77</b>                       |
| Fibroblast growth factor 1                                             | Fgf1                            | 0.783050              | 1,12                               |

|                                                                                                                                 |          |                 |               |
|---------------------------------------------------------------------------------------------------------------------------------|----------|-----------------|---------------|
| Fibroblast growth factor 2                                                                                                      | Fgf2     | 0.589767        | 1,04          |
| Fibroblast growth factor receptor 1                                                                                             | Fgfr1    | <b>0.001155</b> | <b>-1,48</b>  |
| Fibroblast growth factor receptor 2                                                                                             | Fgfr2    | <b>0.000058</b> | <b>-3,91</b>  |
| FMS-like tyrosine kinase 1                                                                                                      | Flt1     | 0.203079        | 1,37          |
| Fibronectin 1                                                                                                                   | Fn1      | 0.578258        | -1,11         |
| Growth differentiation factor 10                                                                                                | Gdf10    | 0.194805        | -1,31         |
| GLI-Kruppel family member GLI1                                                                                                  | Gli1     | <b>0.005353</b> | <b>-9,42</b>  |
| Intercellular adhesion molecule 1                                                                                               | Icam1    | <b>0.001208</b> | <b>-1,45</b>  |
| Insulin-like growth factor 1                                                                                                    | Igf1     | <b>0.001169</b> | <b>-2,28</b>  |
| Insulin-like growth factor I receptor                                                                                           | Igf1r    | 0.451985        | -1,08         |
| Indian hedgehog                                                                                                                 | Ihh      | 0.078081        | -1,61         |
| Integrin alpha 2                                                                                                                | Itga2    | <b>0.008979</b> | <b>-2,85</b>  |
| Integrin alpha 2b                                                                                                               | Itga2b   | 0.060453        | -1,22         |
| Integrin alpha 3                                                                                                                | Itga3    | 0.296137        | 1,13          |
| Integrin alpha M                                                                                                                | Itgam    | <b>0.027496</b> | <b>-14,43</b> |
| Integrin alpha V                                                                                                                | Itgav    | 0.196625        | -1,15         |
| Integrin beta 1 (fibronectin receptor beta)                                                                                     | Itgb1    | <b>0.006666</b> | -1,32         |
| Matrix metalloproteinase 10                                                                                                     | Mmp10    | <b>0.012145</b> | <b>7,60</b>   |
| Matrix metalloproteinase 2                                                                                                      | Mmp2     | 0.069059        | -1,15         |
| Matrix metalloproteinase 8                                                                                                      | Mmp8     | N/A             | -1,49         |
| Matrix metalloproteinase 9                                                                                                      | Mmp9     | <b>0.003412</b> | <b>-26,49</b> |
| Nuclear factor of kappa light polypeptide gene enhancer in B-cells 1, p105                                                      | Nfkb1    | <b>0.006557</b> | <b>-1,48</b>  |
| Noggin                                                                                                                          | Nog      | <b>0.001018</b> | <b>-3,17</b>  |
| Platelet derived growth factor, alpha                                                                                           | Pdgfa    | <b>0.027152</b> | -1,22         |
| Phosphate regulating gene with homologies to endopeptidases on the X chromosome (hypophosphatemia, vitamin D resistant rickets) | Phex     | <b>0.010368</b> | <b>-2,84</b>  |
| Runt related transcription factor 2                                                                                             | Runx2    | <b>0.019048</b> | <b>-1,79</b>  |
| Serine (or cysteine) peptidase inhibitor, clade H, member 1                                                                     | Serpinh1 | <b>0.000148</b> | <b>-1,51</b>  |
| MAD homolog 1 (Drosophila)                                                                                                      | Smad1    | 0.210624        | -1,07         |
| MAD homolog 2 (Drosophila)                                                                                                      | Smad2    | <b>0.002953</b> | <b>-1,63</b>  |
| MAD homolog 3 (Drosophila)                                                                                                      | Smad3    | <b>0.000181</b> | <b>-1,54</b>  |
| MAD homolog 4 (Drosophila)                                                                                                      | Smad4    | <b>0.000203</b> | <b>-1,71</b>  |
| MAD homolog 5 (Drosophila)                                                                                                      | Smad5    | <b>0.001752</b> | <b>-1,65</b>  |
| Sclerostin                                                                                                                      | Sost     | <b>0.017730</b> | <b>-6,94</b>  |
| SRY-box containing gene 9                                                                                                       | Sox9     | <b>0.001301</b> | <b>-2,38</b>  |
| Sp7 transcription factor 7                                                                                                      | Sp7      | <b>0.028665</b> | <b>-3,83</b>  |
| Secreted phosphoprotein 1                                                                                                       | Spp1     | <b>0.000062</b> | <b>5,02</b>   |
| Transforming growth factor, beta 1                                                                                              | Tgfb1    | 0.857611        | 1,01          |
| Transforming growth factor, beta 2                                                                                              | Tgfb2    | <b>0.003229</b> | <b>-1,52</b>  |

|                                                       |         |                 |              |
|-------------------------------------------------------|---------|-----------------|--------------|
| Transforming growth factor, beta 3                    | Tgfb3   | 0.891894        | -1,01        |
| Transforming growth factor, beta receptor I           | Tgfbr1  | <b>0.018723</b> | -1,44        |
| Transforming growth factor, beta receptor II          | Tgfbr2  | 0.106082        | -1,18        |
| Transforming growth factor, beta receptor III         | Tgfbr3  | <b>0.004518</b> | <b>-1,51</b> |
| Tumor necrosis factor                                 | Tnf     | 0.281726        | -1,51        |
| Tumor necrosis factor (ligand) superfamily, member 11 | Tnfsf11 | <b>0.026206</b> | <b>1,65</b>  |
| Twist homolog 1 (Drosophila)                          | Twist1  | <b>0.000990</b> | -1,19        |
| Vascular cell adhesion molecule 1                     | Vcam1   | <b>0.004041</b> | -1,42        |
| Vitamin D receptor                                    | Vdr     | <b>0.042195</b> | -1,35        |
| Vascular endothelial growth factor A                  | Vegfa   | 0.656663        | -1,05        |
| Vascular endothelial growth factor B                  | Vegfb   | <b>0.001980</b> | -1,25        |
